# Supplementary material for: Frailty and Age Impact Immune Responses to Moderna COVID-19 mRNA Vaccine
Source: PubMed Central journal article supplement (PMC9387536; doi:10.21203/rs.3.rs-1883093/v1), 2022-08-01
Supplement: FVTable1.pdf [file FVTable1.pdf]

| <b>Table 1. Retirement Community Cohort</b> |                  |                                                                                    |                  |                  |                 |  |
|---------------------------------------------|------------------|------------------------------------------------------------------------------------|------------------|------------------|-----------------|--|
| <b>Living Setting*</b>                      |                  |                                                                                    |                  |                  |                 |  |
| Nursing Home                                |                  | 5 (33%)                                                                            |                  |                  |                 |  |
| Assisted Living Facility                    |                  | 10 (67%)                                                                           |                  |                  |                 |  |
| <b>Prior COVID-19 infection*</b>            |                  | 3 (20%)                                                                            |                  |                  |                 |  |
| <b>Sex, Female*</b>                         |                  | 12 (80%)                                                                           |                  |                  |                 |  |
| <b>Race, White (non-Hispanic)*</b>          |                  | 15 (100%)                                                                          |                  |                  |                 |  |
| <b>Age, median (min, max)</b>               |                  | 90 years (62 – 101)                                                                |                  |                  |                 |  |
| <b>Age Histogram</b>                        |                  | 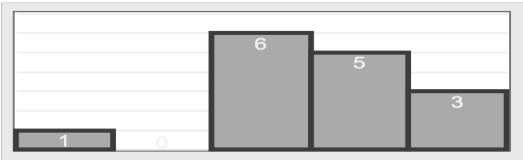 |                  |                  |                 |  |
| <b>Clinical Frailty Scale (CFS)*</b>        |                  |                                                                                    |                  |                  |                 |  |
| Mild Frailty                                |                  | 3 (20%)                                                                            |                  |                  |                 |  |
| Moderate Frailty                            |                  | 7 (47%)                                                                            |                  |                  |                 |  |
| Severe Frailty                              |                  | 5 (33%)                                                                            |                  |                  |                 |  |
| <b>Sample Collections*</b>                  |                  |                                                                                    |                  |                  |                 |  |
| <b>Baseline</b>                             | <b>Dose 2</b>    | <b>2 weeks</b>                                                                     | <b>3 months</b>  | <b>6 months</b>  | <b>2 weeks</b>  |  |
| <b>Dose 1</b>                               | <b>(28 days)</b> | <b>p. Dose 2</b>                                                                   | <b>p. Dose 2</b> | <b>p. Dose 2</b> | <b>p. Boost</b> |  |
| 9 (60%)                                     | 15 (100%)        | 14 (93%)                                                                           | 13 (87%)         | 14 (93%)         | 8 (53%)         |  |

\*N (%)
